# Supplementary material for: The internal structure of gadolinium and perfluorocarbon-loaded polymer nanoparticles affects 19F MRI relaxation times
Source: Royal Society of Chemistry journal article supplement (doi:10.1039/d3nr04577c), 2023-01-01
Supplement: d3nr04577c1.pdf [file d3nr04577c1.pdf]

Supporting Information to  
**Internal Structure of Gd-doped polymer entrapped-perfluorocarbon  
nanoparticles affect <sup>19</sup>F relaxation**

Alvja Mali<sup>1,2, ‡</sup>, Margot Verbeelen<sup>3,‡</sup>, Paul B. White<sup>4</sup>, Alexander H.J. Staal<sup>3</sup>, N. Koen van Riessen<sup>1,3</sup>, Cyril Cadiou<sup>5</sup>, Françoise Chuburu<sup>5</sup>, Olga Koshkina<sup>3, 7 ‡, \*</sup>, Mangala Srinivas<sup>1, 6, ‡, \*</sup>.

<sup>1</sup>Department of Cell Biology and Immunology, Wageningen University and Research, Wageningen, The Netherlands.

<sup>2</sup>Leiden University Medical Center, Leiden, The Netherlands.

<sup>3</sup> Department of Tumor Immunology, Radboud Institute for Molecular Life Sciences, Radboud University Medical Center, Nijmegen, The Netherlands.

<sup>4</sup>Institute for Molecules and Materials, Radboud University, Nijmegen, The Netherlands,

<sup>5</sup>Université de Reims Champagne Ardenne, CNRS, ICMR UMR 7312, Reims, France

<sup>6</sup> Sustainable Polymer Chemistry Group, Department of Molecules and Materials, Mesa+ Institute for Nanotechnology, University of Twente, Enschede, The Netherlands

<sup>7</sup> Cenya Imaging B.V., Amsterdam, The Netherlands

Table of Content

|    |                                                                                                 |   |
|----|-------------------------------------------------------------------------------------------------|---|
| 1  | Characterization of nanoparticles and nanocapsules by dynamic light scattering (DLS).....       | 2 |
| 2  | Characterization of nanoparticles and nanocapsules by cryogenic SEM.....                        | 3 |
| 3  | Determination of Gd- and PFCE-content.....                                                      | 4 |
| 4  | Cell Viability Testing.....                                                                     | 5 |
| 5  | Measurements of the Relaxation Rates by <sup>19</sup> F NMR spectroscopy.....                   | 5 |
| 6  | NMR Spectra of nanoparticles and nanocapsules with different gadolinium content.....            | 7 |
| 7  | Quantification of MRI signal.....                                                               | 8 |
| 8  | Relaxation rates/times measurement of nanoparticles in acidic environment.....                  | 8 |
| 9  | <sup>19</sup> F NMR Spectra of multicore nanoparticles when dissolved in basic environment..... | 9 |
| 10 | <sup>1</sup> H NMR Spectra of multicore nanoparticles loaded with Gd_01.....                    | 9 |

1 Characterization of nanoparticles and nanocapsules by dynamic light scattering (DLS)

**Table S1. Hydrodynamic diameter  $D_h$  and polydispersity index PDI of multicore nanoparticles determined by DLS.**

| <b>Gd added [mg]</b>        | <b>Gd_01</b>                 |            | <b>Gd_02</b>                 |            |
|-----------------------------|------------------------------|------------|------------------------------|------------|
|                             | <b><math>D_h</math> [nm]</b> | <b>PDI</b> | <b><math>D_h</math> [nm]</b> | <b>PDI</b> |
| 0                           | 196                          | 0.1        | -                            | -          |
| 0.2                         | 205                          | 0.1        | 205                          | 0.2        |
| 0.4                         | 298                          | 0.1        | 194                          | 0.1        |
| 0.7                         | 186                          | 0.06       | 178                          | 0.1        |
| 0.9                         | 185                          | 0.05       | 196                          | 0.07       |
| 1.1                         | 225                          | 0.1        | 263                          | 0.2        |
| 2.2                         | 208                          | 0.1        | 207                          | 0.1        |
| <b>Prohance,<br/>140 mg</b> | 180                          | 0.05       |                              |            |

**Table S2. Hydrodynamic diameter  $D_h$  and polydispersity index PDI of core-shell capsules determined by DLS.**

| <b>Gd added [mg]</b>        | <b>Gd_01</b>                 |            | <b>Gd_02</b>                 |            |
|-----------------------------|------------------------------|------------|------------------------------|------------|
|                             | <b><math>D_h</math> [nm]</b> | <b>PDI</b> | <b><math>D_h</math> [nm]</b> | <b>PDI</b> |
| 0                           | 145                          | 0.07       | -                            | -          |
| 0.2                         | 161                          | 0.1        | 160                          | 0.05       |
| 1.1                         | 189                          | 0.2        | 159                          | 0.2        |
| 2.2                         | 166                          | 0.03       | 178                          | 0.2        |
| <b>Prohance,<br/>140 mg</b> | 155                          | 0.07       | -                            | -          |

## 2 Characterization of nanoparticles and nanocapsules by cryogenic SEM

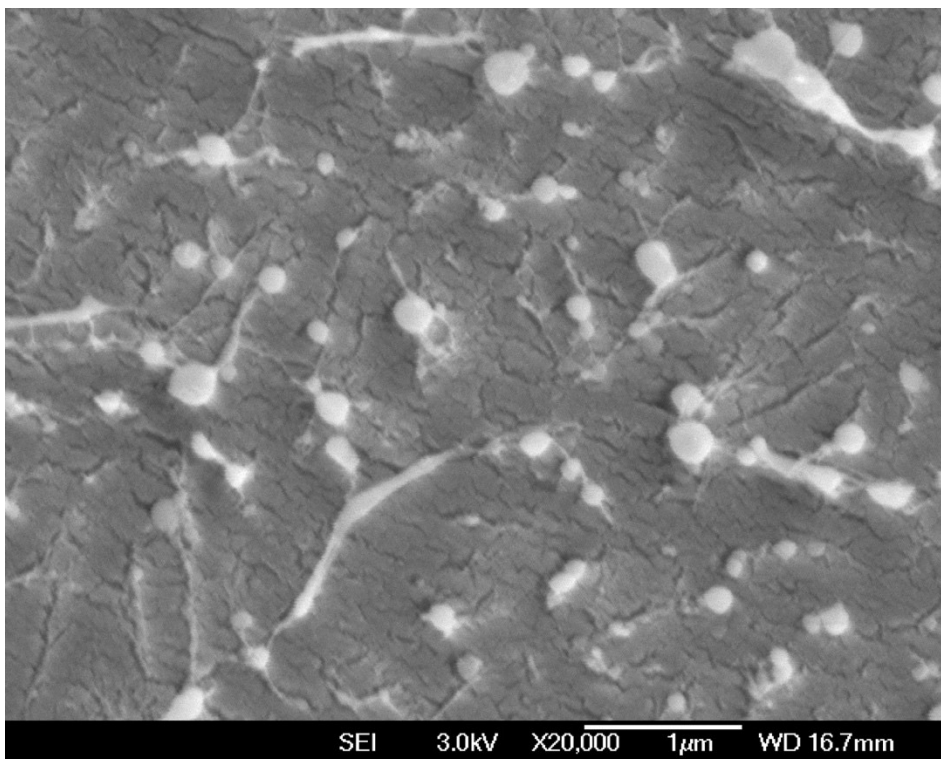

**Figure S1.** Cryogenic Scanning Electron Microscopy (cryoSEM) micrograph of multicore nanoparticles that were prepared using 1.1 mg Gd<sub>01</sub>. c=10 mg mL<sup>-1</sup>, scale bar 1 μm.

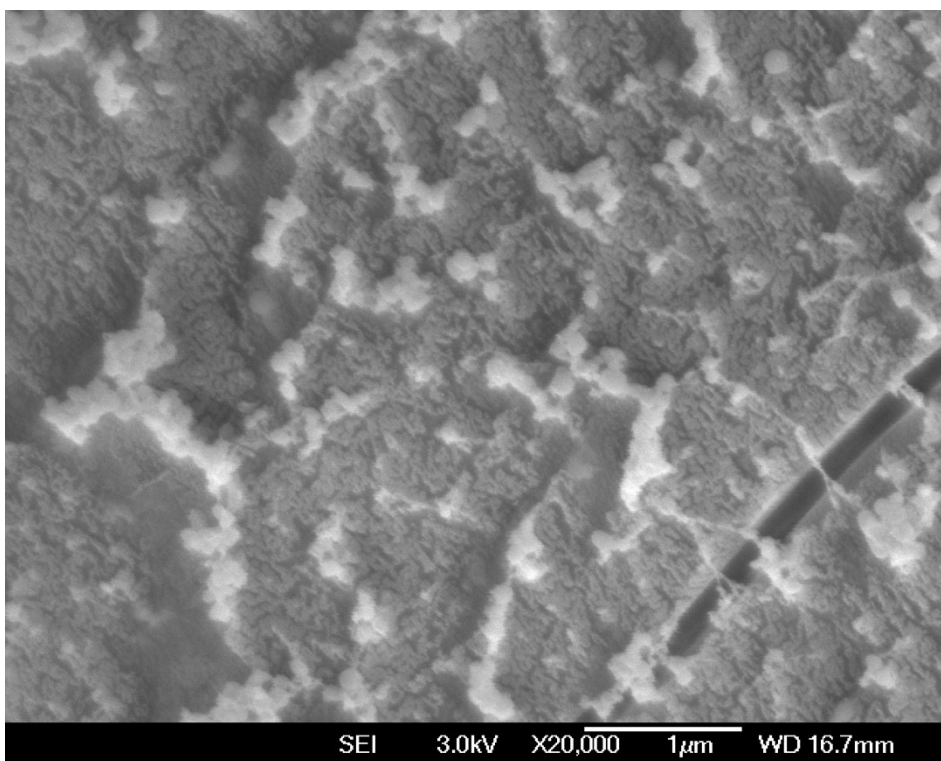

**Figure S2.** Cryogenic Scanning Electron Microscopy (cryoSEM) micrograph of nanocapsules that were prepared using 1.1 mg Gd<sub>01</sub>. c=10 mg mL<sup>-1</sup>, scale bar 1 μm.

### 3 Determination of Gd- and PFCE-content

**Table S3. Multicore nanoparticles: Determination of Gd-content by ICP MS and PFCE-content by <sup>19</sup>F NMR spectroscopy (see Figure 2).**

| Gd added [mg]           | Gd-content [ $\mu\text{g}(\text{Gd}) \text{mg}(\text{NP})^{-1}$ ] |       | PFCE-content [wt.-%] |       |
|-------------------------|-------------------------------------------------------------------|-------|----------------------|-------|
|                         | Gd_01                                                             | Gd_02 | Gd_01                | Gd_02 |
| 0                       | 0.0009                                                            |       | 22                   |       |
| 0.2                     | 0.72                                                              | 1.2   | 29                   | 16    |
| 0.4                     | 0.97                                                              | 1.6   | 15                   | 13    |
| 0.7                     | 1.8                                                               | 2.9   | 11                   | 11    |
| 0.9                     | 2.4                                                               | 3.7   | 11                   | 9     |
| 1.1                     | 2.9                                                               | 5.0   | 8                    | 1     |
| 2.2                     | 7.2                                                               | 12    | 3                    | 2     |
| <b>Prohance, 140 mg</b> | 0.99                                                              |       | 19                   |       |

**Table S4. Core-shell nanocapsules: Determination of Gd-content by ICP MS and PFCE-content by <sup>19</sup>F NMR spectroscopy (see Figure 2).**

| Gd added [mg]           | Gd-content [ $\mu\text{g}(\text{Gd}) \text{mg}(\text{NP})^{-1}$ ] |       | PFCE-content [wt.-%] |       |
|-------------------------|-------------------------------------------------------------------|-------|----------------------|-------|
|                         | Gd_01                                                             | Gd_02 | Gd_01                | Gd_02 |
| 0                       | 0.003                                                             |       | 12                   |       |
| 0.2                     | 0.97                                                              | 1.9   | 32                   | 34    |
| 1.1                     | 6.8                                                               | 9.2   | 28                   | 33    |
| 2.2                     | 11                                                                | 8.8   | 30                   | 24    |
| <b>Prohance, 140 mg</b> | 0.11                                                              |       | 25                   |       |

#### 4 Cell Viability Testing

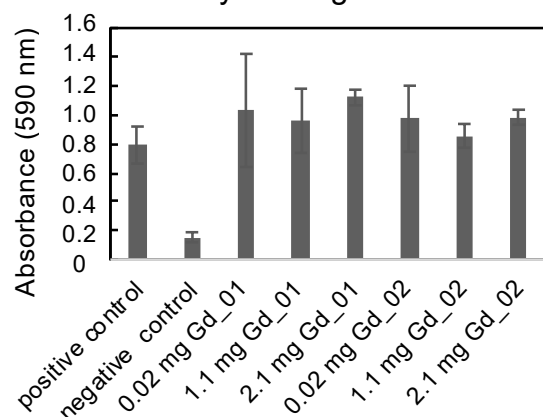

**Figure S3. Viability of nanoparticles in RAW macrophages.** Cells were incubated with the nanoparticles for 24 h. The cell viability was assessed by the MTT assay (absorbance at 590 nm). All labeled cells are viable and display higher absorbance than a positive control (live cells without nanoparticles). The values represent mean  $\pm$  SD (n=2).

#### 5 Measurements of the Relaxation Rates by $^{19}\text{F}$ NMR spectroscopy

**Table S5. Relaxation times and rates of multicore nanoparticles with Gd\_01 (see Figure 3).**

| Gd_01<br>[ $\mu\text{g}(\text{Gd}) \text{mg}(\text{NP})^{-1}$ ] | $T_1$ [s] | $R_1$ [ $\text{s}^{-1}$ ] | $T_2$ [s] | $R_2$ [ $\text{s}^{-1}$ ] |
|-----------------------------------------------------------------|-----------|---------------------------|-----------|---------------------------|
| 0.72                                                            | 0.91      | 1.1                       | 0.63      | 1.6                       |
| 0.97                                                            | 0.75      | 1.3                       | 0.065     | 16                        |
| 1.8                                                             | 0.59      | 1.7                       | 0.017     | 59                        |
| 2.4                                                             | 0.60      | 1.7                       | 0.035     | 29                        |
| 2.9                                                             | 0.68      | 1.5                       | 0.0061    | 164                       |
| 7.2                                                             | 0.26      | 3.9                       | 0.0044    | 230                       |
| Prohance 0.99                                                   | 0.90      | 1.1                       | 0.65      | 1.5                       |
| No Gd; 0.0009                                                   | 0.93      | 1.1                       | 0.69      | 1.4                       |

**Table S6. Relaxation times and rates of multicore nanoparticles with Gd\_02 (see Figure 3).**

| Gd_02<br>[ $\mu\text{g}(\text{Gd}) \text{mg}(\text{NP})^{-1}$ ] | $T_1$ [s] | $R_1$ [ $\text{s}^{-1}$ ] | $T_2$ [s] | $R_2$ [ $\text{s}^{-1}$ ] |
|-----------------------------------------------------------------|-----------|---------------------------|-----------|---------------------------|
| 1.2                                                             | 0.91      | 1.1                       | 0.62      | 1.6                       |
| 1.6                                                             | 0.67      | 1.5                       | 0.030     | 33                        |
| 2.9                                                             | 0.38      | 2.6                       | 0.0041    | 244                       |
| 3.7                                                             | 0.40      | 2.5                       | 0.0060    | 167                       |
| 5.0                                                             | 0.40      | 2.5                       | 0.0034    | 298                       |
| 12                                                              | 0.12      | 8.5                       | 0.0025    | 408                       |
| Prohance 0.99                                                   | 0.90      | 1.1                       | 0.65      | 1.5                       |
| No Gd; 0.0009                                                   | 0.93      | 1.1                       | 0.69      | 1.4                       |

**Table S7. Relaxation times and rates of core-shell nanocapsules with Gd\_01 (see Figure 3).**

| <b>Gd_01</b><br><b>[<math>\mu\text{g}(\text{Gd}) \text{mg}(\text{NP})^{-1}</math>]</b> | <b>T<sub>1</sub> [s]</b> | <b>R<sub>1</sub> [s<sup>-1</sup>]</b> | <b>T<sub>2</sub> [s]</b> | <b>R<sub>2</sub> [s<sup>-1</sup>]</b> |
|----------------------------------------------------------------------------------------|--------------------------|---------------------------------------|--------------------------|---------------------------------------|
| 0.97                                                                                   | 0.84                     | 1.2                                   | 0.20                     | 5.0                                   |
| 6.8                                                                                    | 0.84                     | 1.2                                   | 0.074                    | 13                                    |
| 11                                                                                     | 0.80                     | 1.2                                   | 0.049                    | 20                                    |
| Prohance 0.11                                                                          | 0.90                     | 1.1                                   | 0.47                     | 2.1                                   |
| No Gd; 0.003                                                                           | 0.86                     | 1.2                                   | 0.37                     | 2.7                                   |

**Table S8. Relaxation times and rates of core-shell nanocapsules with Gd\_02 (see Figure 3).**

| <b>Gd_02</b><br><b>[<math>\mu\text{g}(\text{Gd}) \text{mg}(\text{NP})^{-1}</math>]</b> | <b>T<sub>1</sub> [s]</b> | <b>R<sub>1</sub> [s<sup>-1</sup>]</b> | <b>T<sub>2</sub> [s]</b> | <b>R<sub>2</sub> [s<sup>-1</sup>]</b> |
|----------------------------------------------------------------------------------------|--------------------------|---------------------------------------|--------------------------|---------------------------------------|
| 1.9                                                                                    | 0.86                     | 1.2                                   | 0.12                     | 8.2                                   |
| 9.2                                                                                    | 0.82                     | 1.2                                   | 0.047                    | 21                                    |
| 8.8                                                                                    | 0.83                     | 1.2                                   | 0.030                    | 34                                    |
| Prohance 0.11                                                                          | 0.90                     | 1.1                                   | 0.47                     | 2.1                                   |
| No Gd; 0.003                                                                           | 0.86                     | 1.2                                   | 0.37                     | 2.7                                   |

## 6 NMR Spectra of nanoparticles and nanocapsules with different gadolinium content

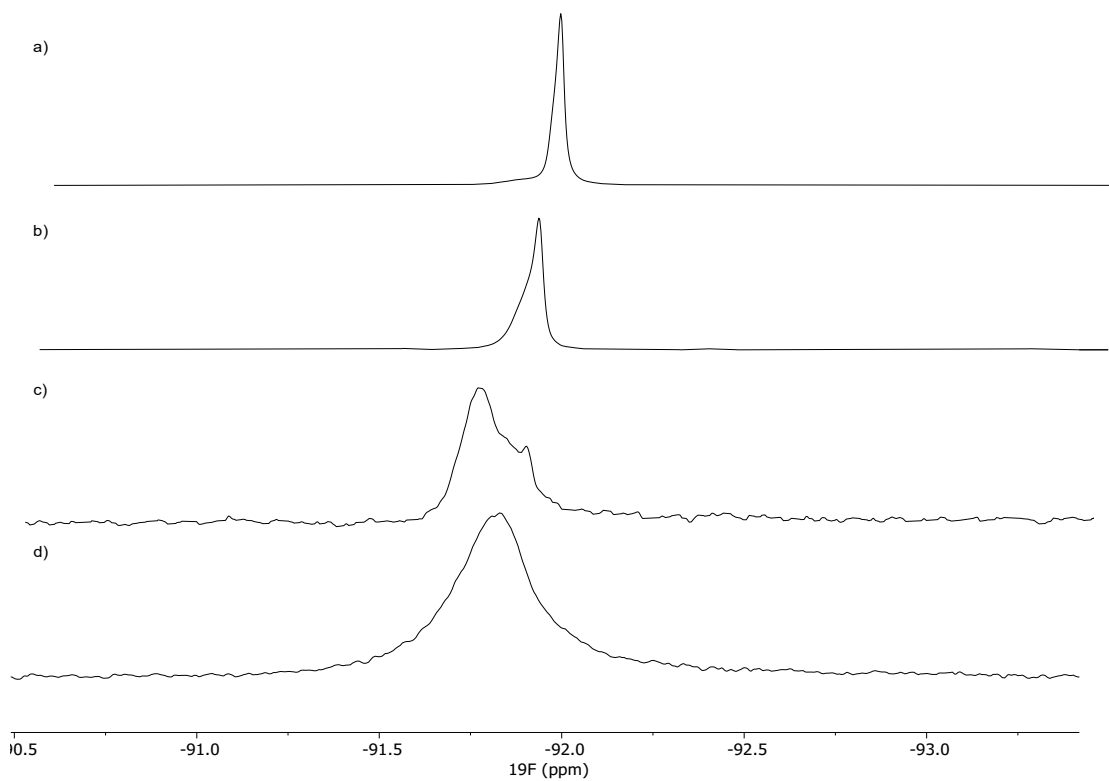

**Figure S4. Stacked  $^{19}\text{F}$  NMR spectra of PFCE-loaded nanoparticles: (a) Gd-free h (b) Prohance, (c) 5 mg BK21 or (d) 10 mg BK21.**

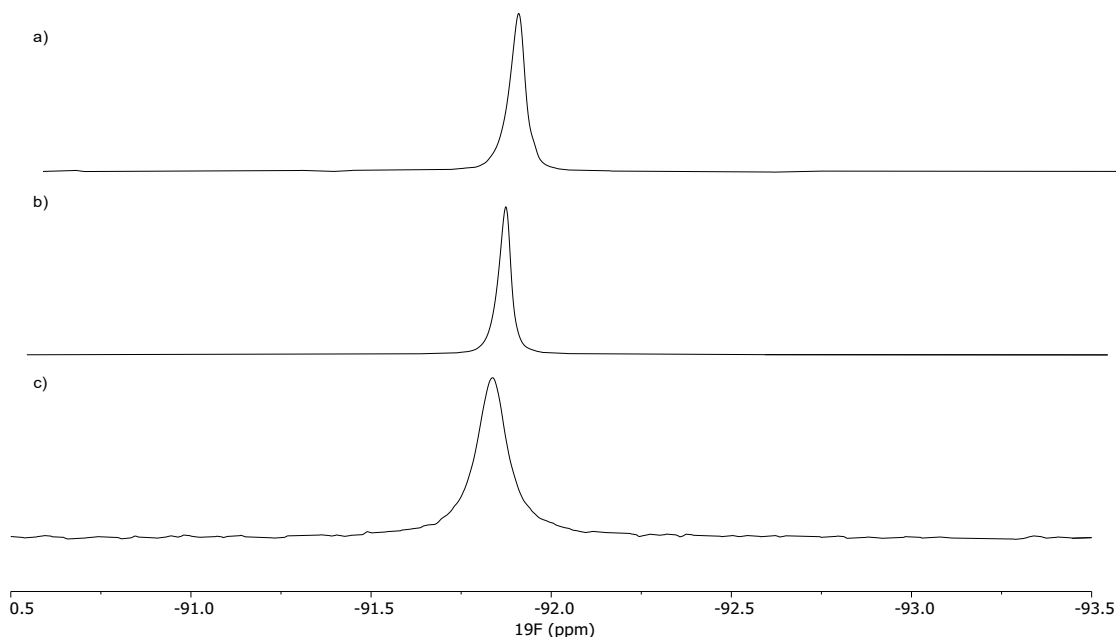

**Figure S5. Stacked  $^{19}\text{F}$  spectra of PFCE-loaded nanocapsules: (a) Gd-free, (b) Prohance, and (c) 10 mg BK21. Nanocapsules in  $\text{D}_2\text{O}$ ,  $c = 10 \text{ mg mL}^{-1}$ , 378 MHz.**

## 7 Quantification of MRI signal

**Table S9. Signal-to-Noise ratio (SNR) of  $^{19}\text{F}$  and  $^1\text{H}$  MRI signals, 11.7 T (see Figure 4).**

| Gd [ $\mu\text{g}(\text{Gd}) \text{ mg}(\text{NP})^{-1}$ ] | PFCE [wt.-%] | $^{19}\text{F}$ SNR | $^1\text{H}$ SNR |
|------------------------------------------------------------|--------------|---------------------|------------------|
| Water-ctrl: 0                                              | 0            | 1.0                 | 16               |
| No-Gd NPs: 0                                               | 27           | 7.4                 | 17               |
| 0.7                                                        | 29           | 8.4                 | 29               |
| 1.0                                                        | 15           | 2.9                 | 33               |
| 1.8                                                        | 11           | 1.0                 | 38               |
| 2.4                                                        | 11           | 1.5                 | 49               |

## 8 Relaxation rates/times measurement of nanoparticles in acidic environment

**Table S10. Relaxation times and rates of multicore nanoparticles loaded with Gd\_01 at different pH (see Figure 5).**

| pH  | Gd_01     |                           |           |                           | No Gd     |                           |           |                           |
|-----|-----------|---------------------------|-----------|---------------------------|-----------|---------------------------|-----------|---------------------------|
|     | $T_1$ [s] | $R_1$ [ $\text{s}^{-1}$ ] | $T_2$ [s] | $R_2$ [ $\text{s}^{-1}$ ] | $T_1$ [s] | $R_1$ [ $\text{s}^{-1}$ ] | $T_2$ [s] | $R_2$ [ $\text{s}^{-1}$ ] |
| 2   | 0.79      | 1.26                      | 0.25      | 4                         | 0.81      | 1.23                      | 0.4       | 2.5                       |
| 3   | 0.73      | 1.37                      | 0.16      | 6.25                      | 0.80      | 1.25                      | 0.4       | 2.5                       |
| 5.5 | 0.68      | 1.47                      | 0.04      | 27.8                      | 0.80      | 1.25                      | 0.45      | 2                         |

|   |      |      |       |      |      |      |      |     |
|---|------|------|-------|------|------|------|------|-----|
| 7 | 0.65 | 1.54 | 0.017 | 58.8 | 0.82 | 1.23 | 0.45 | 2.2 |
|---|------|------|-------|------|------|------|------|-----|

**Table S11. Relaxation times and rates of multicore nanoparticles loaded with Gd<sub>02</sub> at different pH.**

| pH  | Gd <sub>02</sub>   |                                   |                    |                                   | No Gd              |                                   |                    |                                   |
|-----|--------------------|-----------------------------------|--------------------|-----------------------------------|--------------------|-----------------------------------|--------------------|-----------------------------------|
|     | T <sub>1</sub> [s] | R <sub>1</sub> [s <sup>-1</sup> ] | T <sub>2</sub> [s] | R <sub>2</sub> [s <sup>-1</sup> ] | T <sub>1</sub> [s] | R <sub>1</sub> [s <sup>-1</sup> ] | T <sub>2</sub> [s] | R <sub>2</sub> [s <sup>-1</sup> ] |
| 2   | 0.77               | 1.3                               | 0.3                | 3.3                               | 0.81               | 1.23                              | 0.4                | 2.5                               |
| 3   | 0.77               | 1.3                               | 0.22               | 4.5                               | 0.80               | 1.25                              | 0.4                | 2.5                               |
| 5.5 | 0.53               | 1.88                              | 0.017              | 58.8                              | 0.80               | 1.25                              | 0.5                | 2                                 |
| 7   | 0.57               | 1.75                              | 0.019              | 52.6                              | 0.81               | 1.23                              | 0.45               | 2.2                               |

**Table S12. Relaxation times and rates of core-shell nanocapsules loaded with Gd<sub>01</sub> at different pH.**

| pH  | Gd <sub>01</sub>   |                                   |                    |                                   | No Gd              |                                   |                    |                                   |
|-----|--------------------|-----------------------------------|--------------------|-----------------------------------|--------------------|-----------------------------------|--------------------|-----------------------------------|
|     | T <sub>1</sub> [s] | R <sub>1</sub> [s <sup>-1</sup> ] | T <sub>2</sub> [s] | R <sub>2</sub> [s <sup>-1</sup> ] | T <sub>1</sub> [s] | R <sub>1</sub> [s <sup>-1</sup> ] | T <sub>2</sub> [s] | R <sub>2</sub> [s <sup>-1</sup> ] |
| 2   | 0.74               | 1.35                              | 0.062              | 16.13                             | 0.78               | 1.28                              | 0.28               | 3.6                               |
| 3   | 0.74               | 1.35                              | 0.063              | 15.87                             | 0.79               | 1.26                              | 0.28               | 3.6                               |
| 5.5 | 0.73               | 1.37                              | 0.061              | 16.39                             | 0.78               | 1.28                              | 0.29               | 3.4                               |
| 7   | 0.73               | 1.37                              | 0.061              | 16.39                             | 0.77               | 1.3                               | 0.27               | 3.7                               |

**Table S13. Relaxation times and rates of core-shell nanocapsules loaded with Gd<sub>02</sub> at different pH.**

| pH  | Gd <sub>02</sub>   |                                   |                    |                                   | No Gd              |                                   |                    |                                   |
|-----|--------------------|-----------------------------------|--------------------|-----------------------------------|--------------------|-----------------------------------|--------------------|-----------------------------------|
|     | T <sub>1</sub> [s] | R <sub>1</sub> [s <sup>-1</sup> ] | T <sub>2</sub> [s] | R <sub>2</sub> [s <sup>-1</sup> ] | T <sub>1</sub> [s] | R <sub>1</sub> [s <sup>-1</sup> ] | T <sub>2</sub> [s] | R <sub>2</sub> [s <sup>-1</sup> ] |
| 2   | 0.73               | 1.37                              | 0.062              | 16.13                             | 0.78               | 1.28                              | 0.28               | 3.6                               |
| 3   | 0.74               | 1.35                              | 0.061              | 16.39                             | 0.79               | 1.26                              | 0.28               | 3.6                               |
| 5.5 | 0.72               | 1.39                              | 0.061              | 16.39                             | 0.78               | 1.28                              | 0.29               | 3.4                               |
| 7   | 0.72               | 1.39                              | 0.062              | 16.13                             | 0.77               | 1.3                               | 0.27               | 3.7                               |

9 <sup>19</sup>F NMR Spectra of multicore nanoparticles when dissolved in basic environment



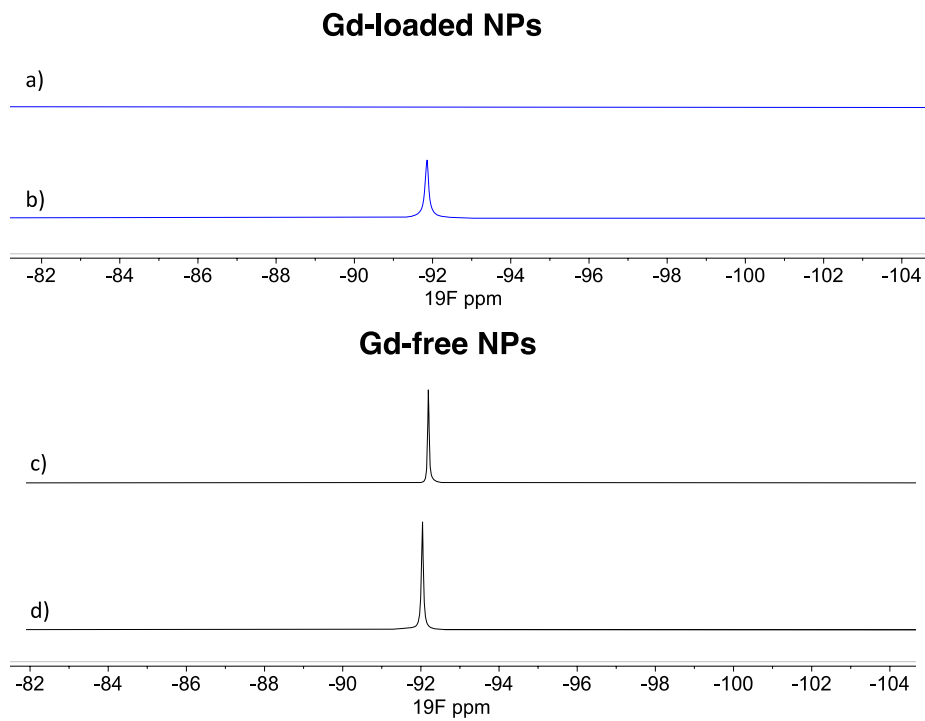

**Figure S6. Stacked  $^{19}\text{F}$  spectra of gadolinium-loaded and Gd\_free multicore nanoparticles when dissolved in: (b and d) neutral (pH 7), and (a and c) basic environment (pH 14). Multicore Nanoparticles:  $c = 10 \text{ mg mL}^{-1}$ , 378 MHz.**

10  $^1\text{H}$  NMR Spectra of multicore nanoparticles loaded with Gd\_01

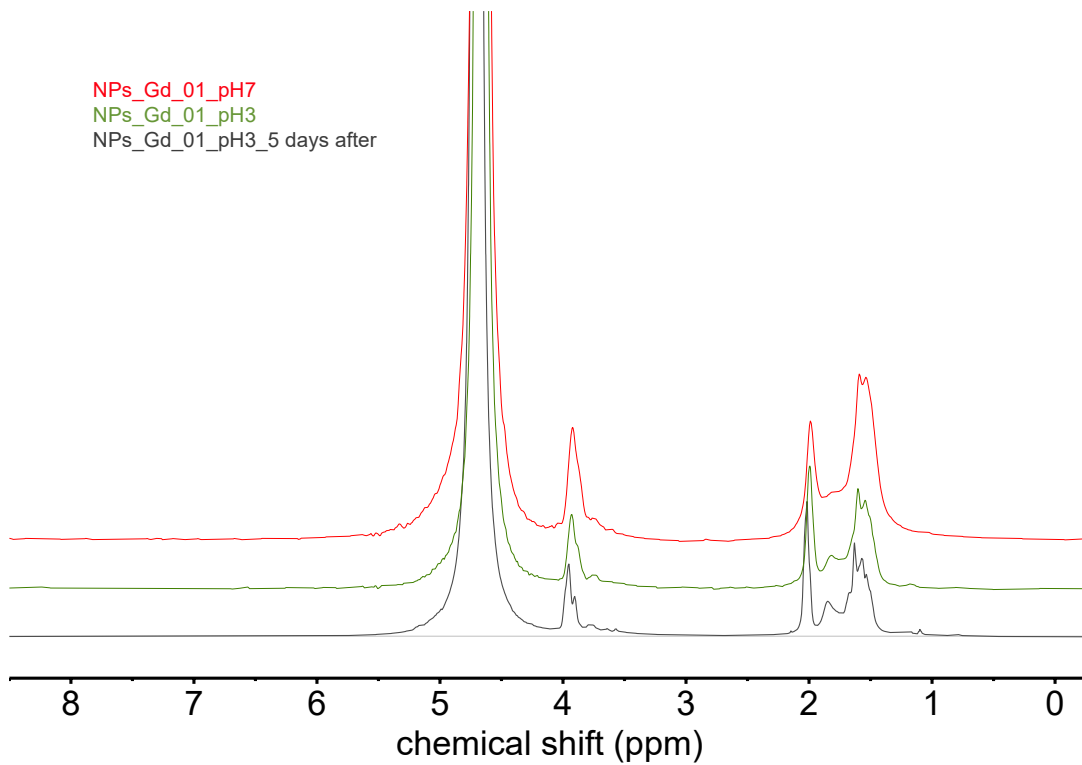

**Figure S7.** <sup>1</sup>H spectral line profile of multicore nanoparticles loaded with Gd<sub>02</sub> at pH 7 and 3, immediately after solubilization and five days after (a) to study the stability in acidic environment. Multicore nanoparticles in in D<sub>2</sub>O (pH 7) and acidic solvent (pH 3), 700 MHz, c = 10 mg mL<sup>-1</sup>.
